# Supplementary material
Source: PubMed Central journal article supplement (PMC6588407)
Supplement: NIHMS1527414-supplement-1.pdf [file NIHMS1527414-supplement-1.pdf]

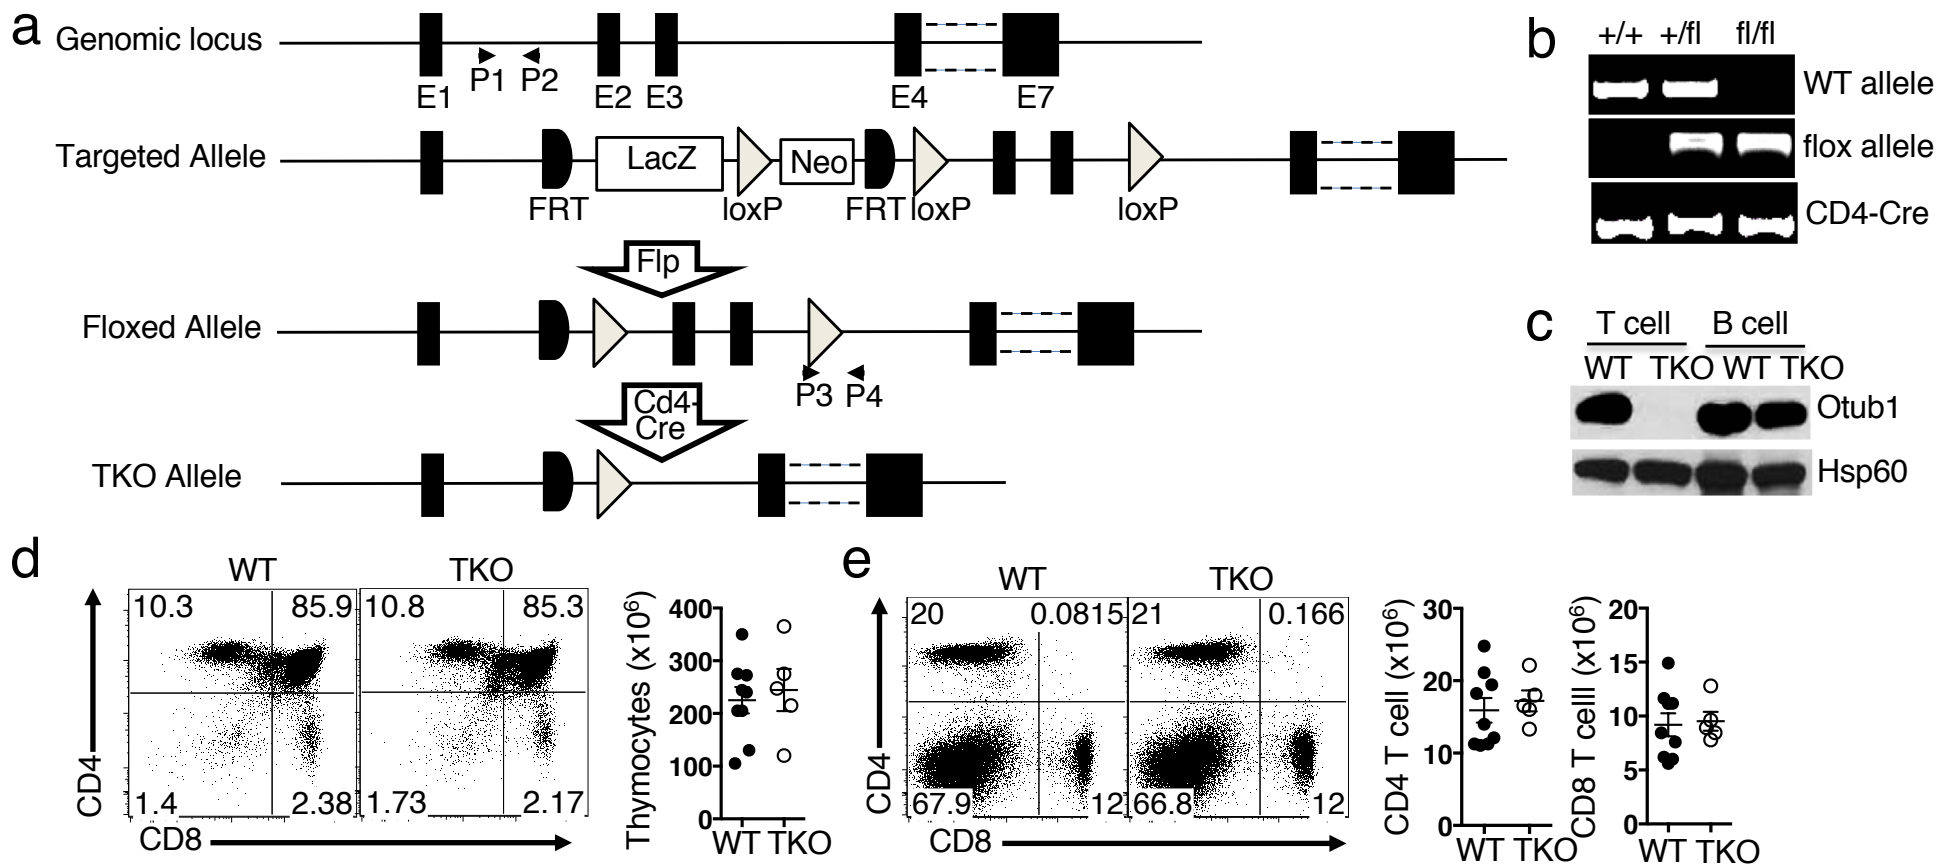

**Supplementary Fig. 1. Otub1 deficiency does not influence the frequency of thymocyte and peripheral T cell populations.** **a**, Schematic picture of *Otub1* gene targeting using an FRT-LoxP vector. Targeted mice were crossed with FLP deleter (Rosa26-FLPe) mice to generate *Otub1*-floxed mice, which were further crossed with *Cd4*-Cre mice to generate T cell-conditional KO (TKO) mice. **b**, Genotyping PCR analysis of floxed and control mice using P1/P2 primer pair for WT allele and P3/P4 primer pair for flox allele. **c**, Immunoblot analysis of Otub1 using sorted T and B cells from WT or *Otub1*-TKO mice. **d**, Flow cytometric analysis of thymocytes from WT and *Otub1*-TKO mice (6 wk old), showing the percentage of CD4<sup>-</sup>CD8<sup>-</sup> double negative, CD4<sup>+</sup>CD8<sup>+</sup> double positive, and CD4<sup>+</sup> and CD8<sup>+</sup> single positive populations. A summary graph of total thymocyte cell number is shown. **e**, Flow cytometric analysis of frequency of CD4 and CD8 T cells in the splenocytes of WT and *Otub1*-TKO mice.

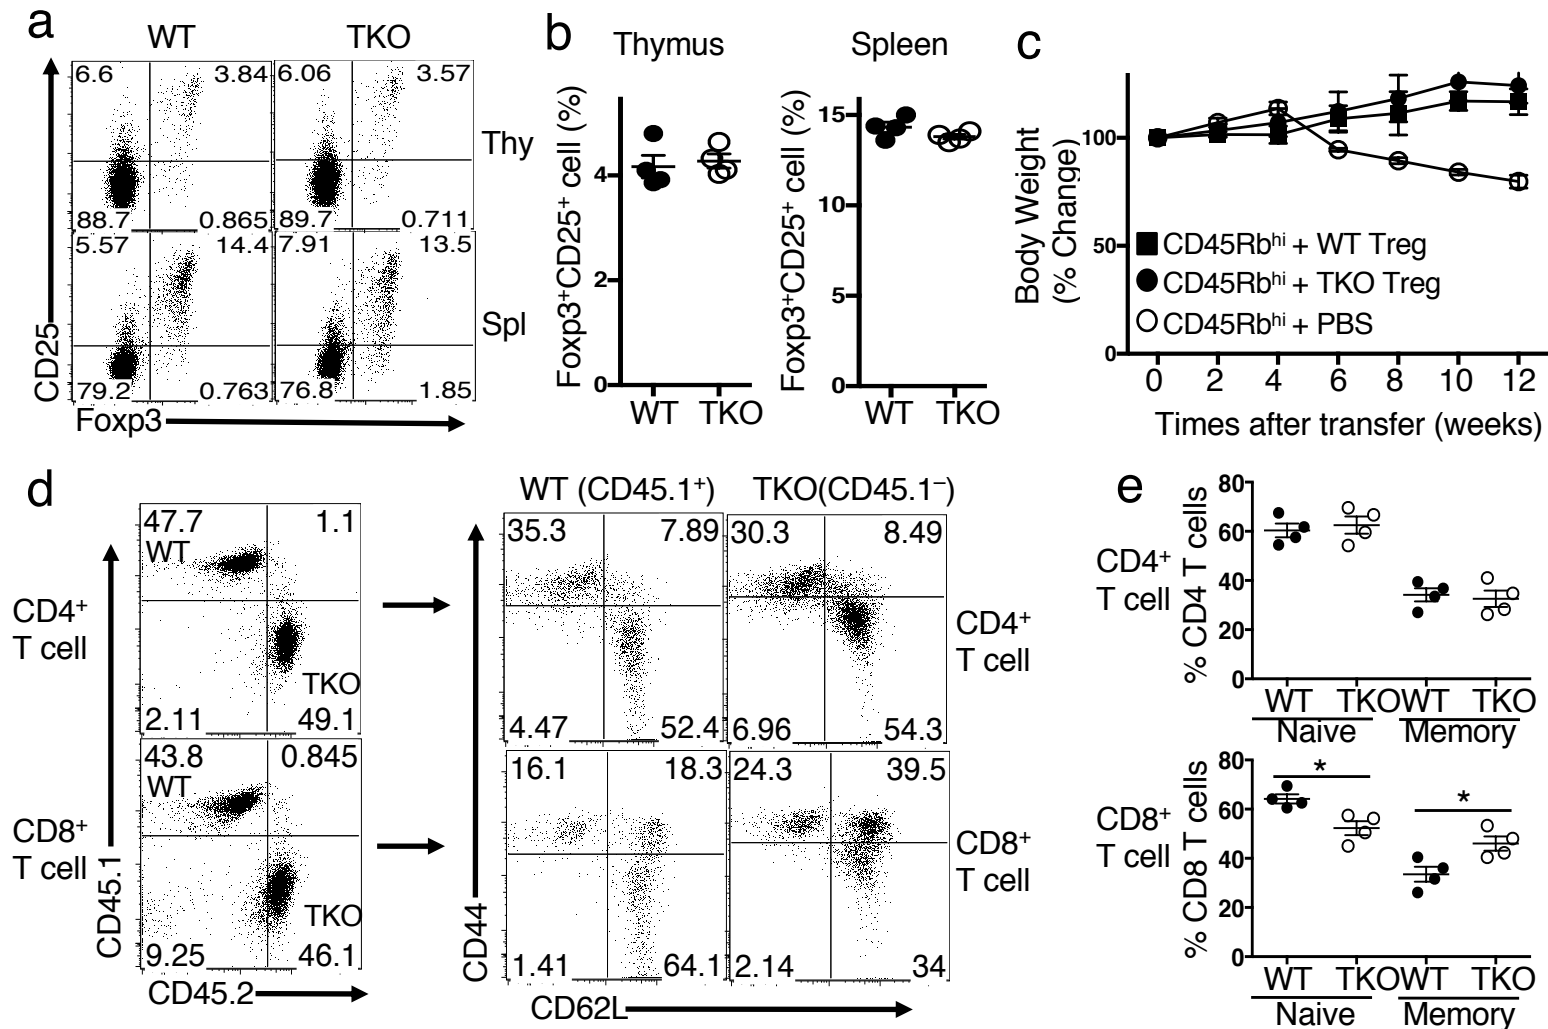

**Supplementary Fig. 2. Otub1 is dispensable for Treg cell generation and function.** **a,b**, Flow cytometric analysis of the frequency of Treg cells (Foxp3<sup>+</sup>CD25<sup>+</sup>) among CD4<sup>+</sup> T cells in the thymus and spleen of age- and sex-matched WT and *Otub1*-TKO mice (6-8 weeks), presented as a representative plot (**a**) and summary graph based on multiple mice (**b**, each circle represents an individual mouse). **c**, Body weight loss of 6-week-old *Rag1*-TKO mice following adoptive transfer with WT naïve CD45RB<sup>hi</sup> CD4 T cells together with either PBS (CD45RB<sup>hi</sup>+PBS) or sorted Treg cells derived from 6-week-old WT mice (CD45RB<sup>hi</sup>+WT Treg) or *Otub1*-TKO mice (CD45RB<sup>hi</sup>+TKO Treg). **d**, Bone marrow cells (2 x 10<sup>6</sup>) from *Otub1*-TKO (CD45.1<sup>-</sup>CD45.2<sup>+</sup>) and WT B6.SJL (CD45.1<sup>+</sup>CD45.2<sup>-</sup>) mice were mixed in 1:1 ratio and adoptively transferred into  $\gamma$ -irradiated *Rag1*-TKO mice. After 6 weeks, recipient mice were sacrificed for flow cytometric analyses of CD4 and CD8 T cells derived from WT and *Otub1*-TKO bone marrows (left) and the naïve and memory populations based on CD44 and CD62L markers (naïve: CD44<sup>lo</sup>CD62L<sup>hi</sup>; memory: CD44<sup>hi</sup>CD62L<sup>lo</sup>) (right). **e**, Summary graphs of the naïve and memory T cell data from **d** based on four recipients of each group. \**P*<0.05(two-tailed unpaired t test).

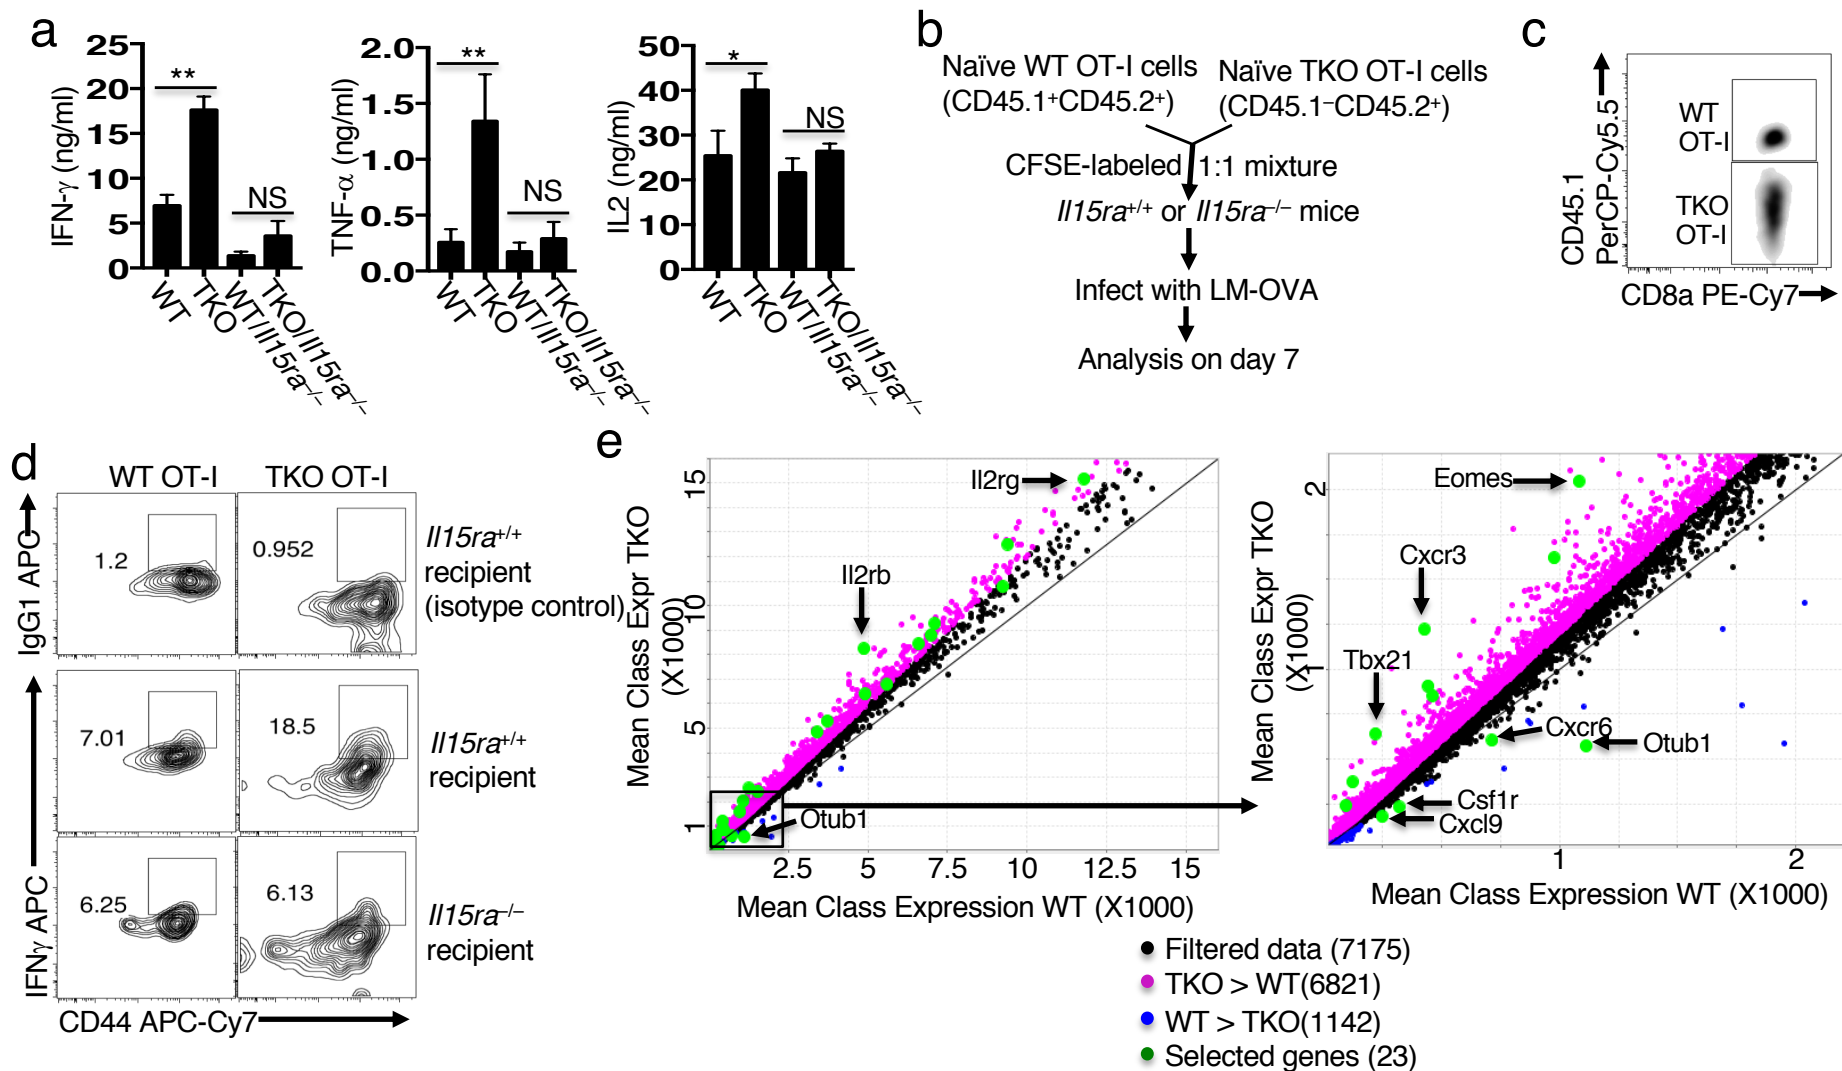

**Supplementary Fig. 3. IL-15 primes CD8 T cells for activation under the control of Otub1.** **a**, ELISA of naïve CD8 T cells derived from WT, *Otub1*-TKO, WT/*Il15ra*<sup>-/-</sup>, and *Otub1*-TKO/*Il15ra*<sup>-/-</sup> mice, in vitro stimulated with anti-CD3 plus anti-CD28 for 66 h. **b**, Schematic of mixed T cell adoptive transfer and listeria infection. *Il15ra*<sup>+/+</sup> or *Il15ra*<sup>-/-</sup> mice were adoptively transferred with CFSE-labeled WT OT-I or *Otub1*-TKO OT-I naïve CD8 T cells mixed in 1:1 ratio (5 x 10<sup>6</sup> cells each) and infected with ovalbumin-expressing recombinant *Listeria monocytogenes* (LM-OVA, 2 x 10<sup>4</sup>). Transferred OT-I cells were analyzed 7 days later. **c,d**, Flow cytometric analysis of total population (**c**) or IFN $\gamma$ -producing effector frequency of WT and *Otub1*-TKO OT-I cells isolated from the LM-OVA-infected recipient mice shown in **b**, stimulated *in vitro* with OVA257-274 for 6 h (**d**). **e**, Scatterplot of significantly upregulated (pink, 6821 genes) and downregulated (blue, 1142 genes) genes in *Otub1*-TKO OT-I T cells relative to WT OT-I T cells. Some of the genes presented in the heatmap shown in Fig. 2g are indicated in green color. RNA sequencing was performed with RNA isolated from untreated naïve WT or *Otub1*-TKO OT-I CD8 T cells. NS, non-significant; \*P<0.05; \*\*P<0.01, two-tailed student's t-test.

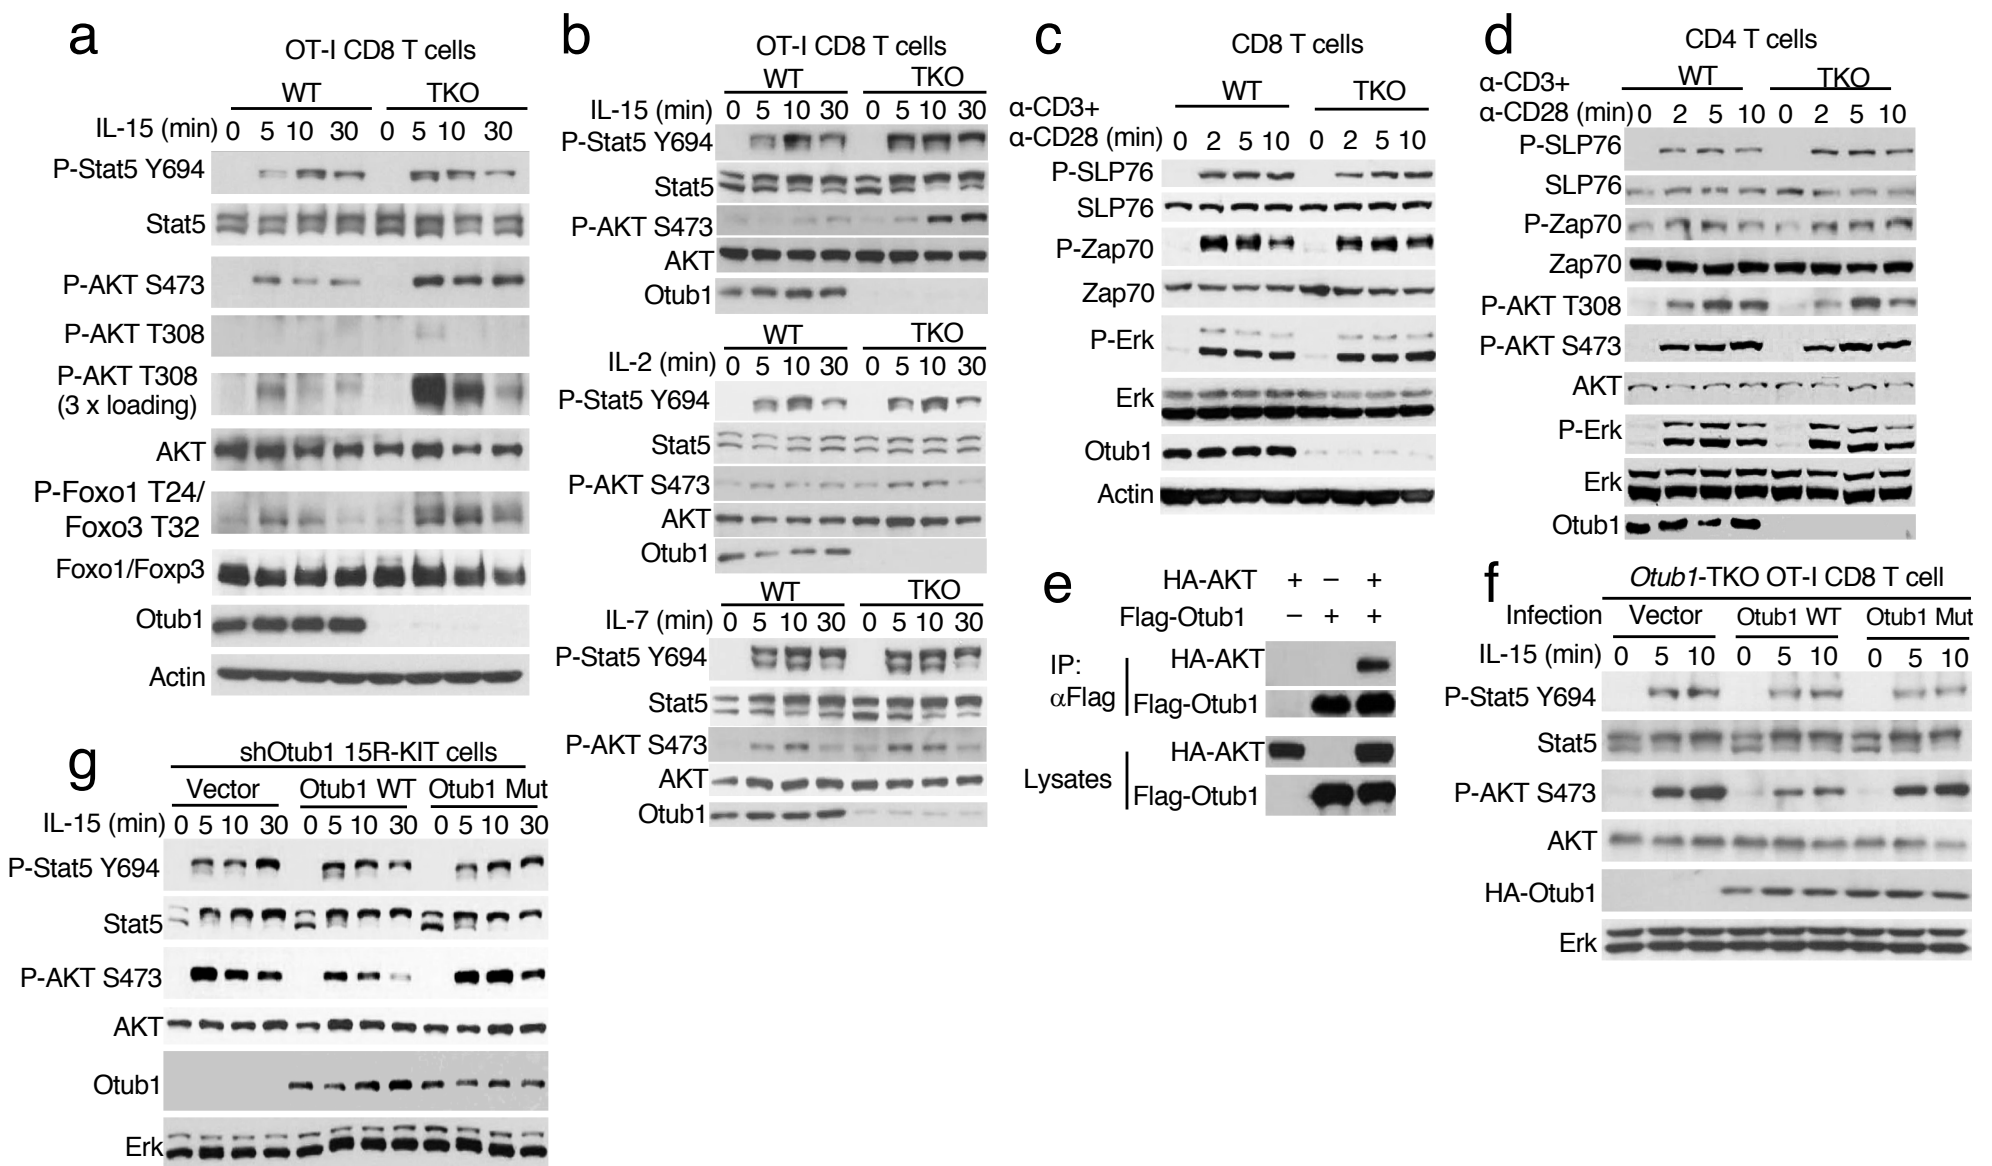

**Supplementary Fig. 4. Otub1 negatively regulates AKT activation in CD8 T cells.** **a-c**, Immunoblot analysis of the indicated phosphorylated (P-) and total proteins in naïve OT-I CD8 T cells (**a,b**), naïve CD8 T cells (**c**), or naïve CD4 T cells (**d**) stimulated with the indicated inducers. A panel of P-AKT T308 with 3 times more loading materials (3 x loading) was included in **a** to visualize the weak AKT T308 phosphorylation stimulated by IL-15. **e**, Co-IP analysis of Otub1-AKT interaction in HEK293 cells transiently transfected with expression vectors encoding the indicated proteins. **f,g**, Immunoblot analysis of the indicated phosphorylated (P-) and total proteins in IL-15-stimulated Otub1-deficient OT-I CD8 T cells (**f**) or Otub1-knockdown 15R-KIT T cells (**g**) infected with an empty retroviral vector or vectors encoding Otub1 wildtype (WT) or an inactive mutant (Mut, D88A/C91S).

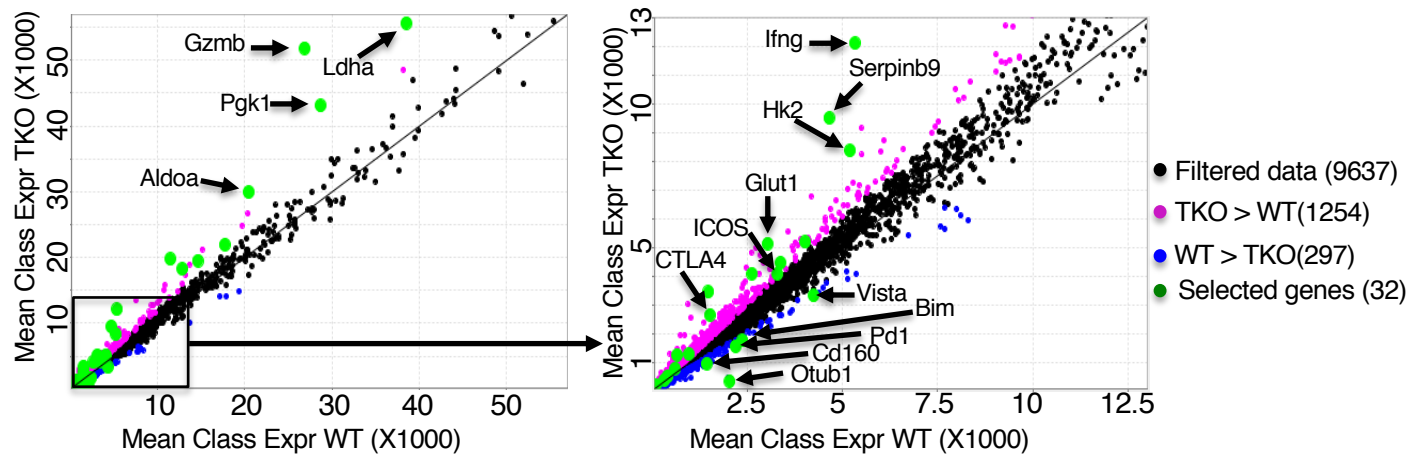

**Supplementary Fig. 5. Otub1 controls gene expression in CD8 T cells.** Scatterplot of significantly upregulated (pink, 1254) and downregulated (blue, 297) genes in Otub1-TKO OT-I T cells relative to WT OT-I T cells stimulated with anti-CD3 plus anti-CD28 for 24 h and analyzed by RNA sequencing. Some of the genes presented in the heatmap of Fig. 6a are indicated in green color.

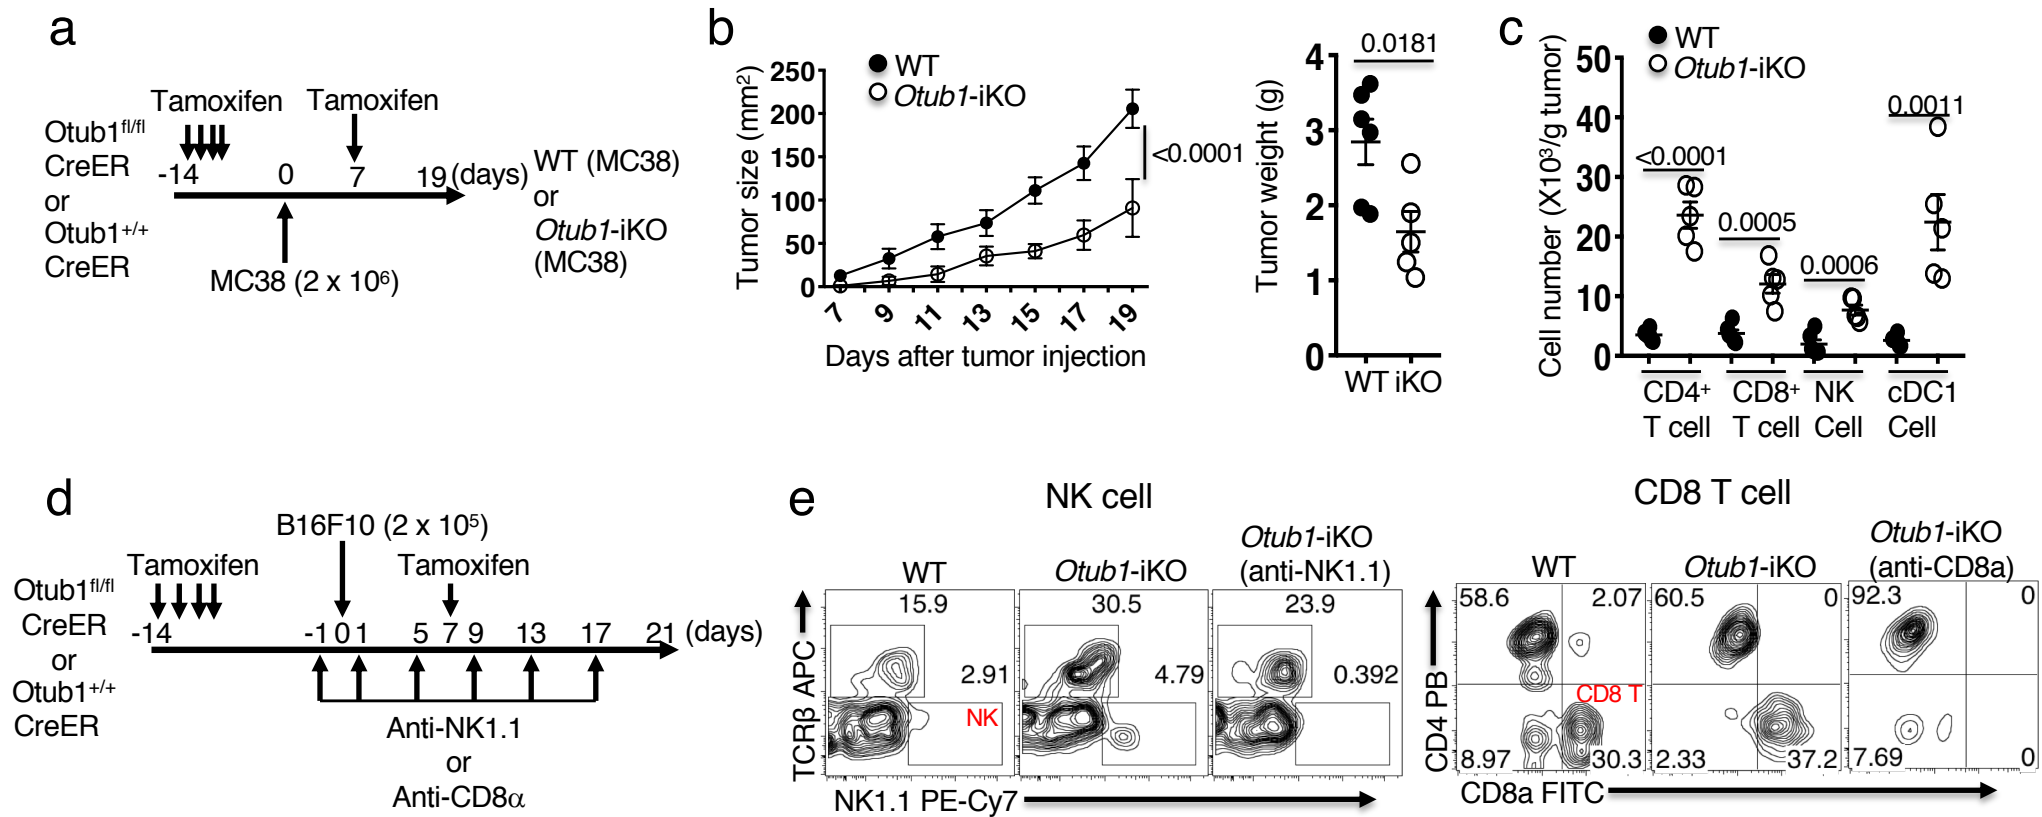

**Supplementary Fig. 6. *Otub1* deletion promotes antitumor immunity via CD8 T cells and NK cells.** **a**, Schematic of experimental procedure, in which the indicated mice were injected with tamoxifen daily for 4 consecutive times starting from day 14 before tumor cell inoculation and one more time on day 7 after tumor inoculation for generating WT or *Otub1* induced KO (iKO) MC38-bearing mice. **b**, Tumor burden of WT and *Otub1*-iKO mice, presented as tumor grow curve (left) and day 19 tumor weight (right). **c**, Summary graph of flow cytometric analysis of tumor-infiltrating immune cells in WT and *Otub1*-iKO mice. **d,e**, Schematic of experimental procedure, in which the indicated mice were injected with tamoxifen daily for 4 consecutive times starting from day 14 before tumor cell inoculation and one more time on day 7 after tumor inoculation for generating WT or *Otub1*-iKO B16F10-bearing mice. Some of the tumor-bearing mice were also injected i.p with anti-NK1.1 and anti-CD8a for depletion of NK cells and CD8 T cells, respectively. **(e)** Flow cytometric analysis of NK cells and CD8 T cells showing the efficiency of antibody-mediated depletion. P values are determined by two-way ANOVA with Bonferroni's post-test (**b**) or two-tailed student's t-test (**c**).

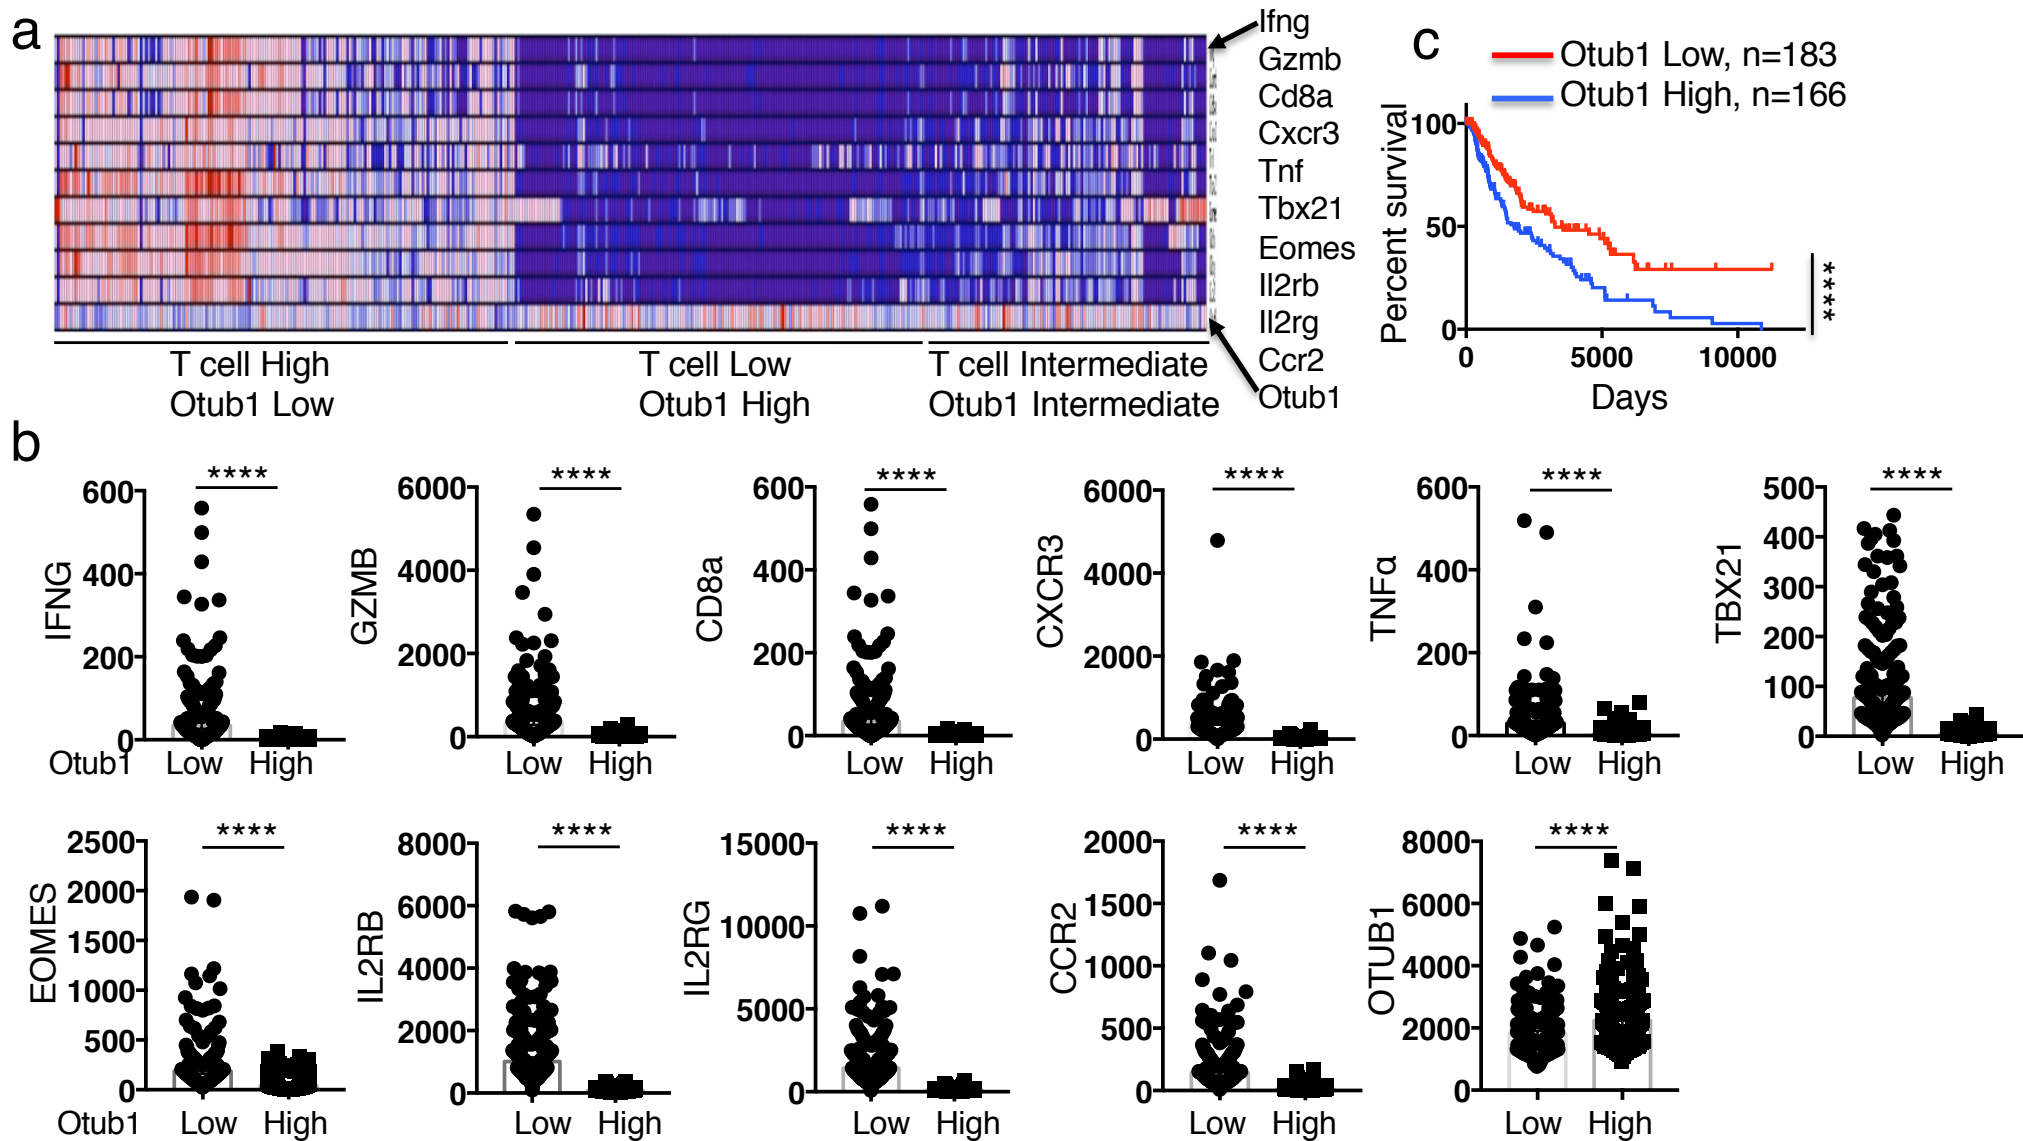

**Supplementary Fig. 7. Otub1 expression level is inversely associated with patient survival and effector T cell signature gene expression in skin cutaneous melanoma.** **a**, Heatmap illustrating the expression of major CD8 effector T cell signature genes (rows) across the 458 skin cutaneous melanoma patients (columns). The color scale of the heatmap indicates relative gene expression. **b**, mRNA level of CD8 T cell signature genes in Otub1 low and high group. \*\*\*\*P<0.0001, two-tailed student's t-test. **c**, Kaplan-Meier plot comparing survival for the two broad clusters of patients identified in hierarchical clustering analysis. (p<0.0001, Log-Rank test).

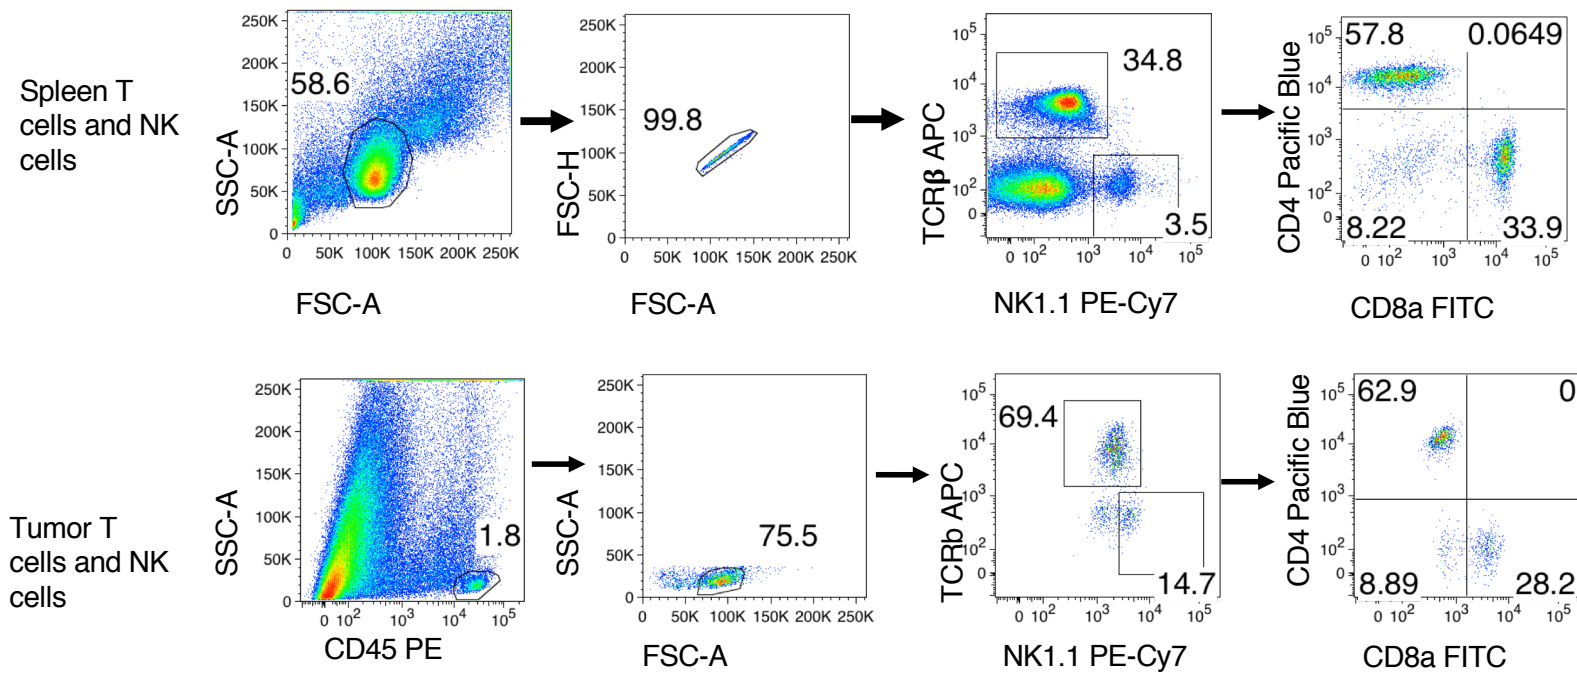

**Supplementary Fig. 8.** Live immune cell populations were gated on the FSC-A and SSC-A, and single cells were gated basing on FSC-A and FAS-H. The subpopulations of the indicated immune cells were gated basing on specific surface markers as indicated in the individual panels.



figure 3b

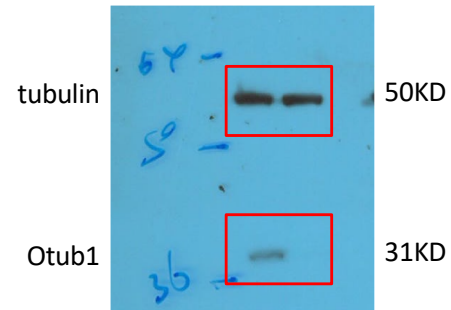

**Supplementary Figure 9. Full scans of blots for figures 3b.**

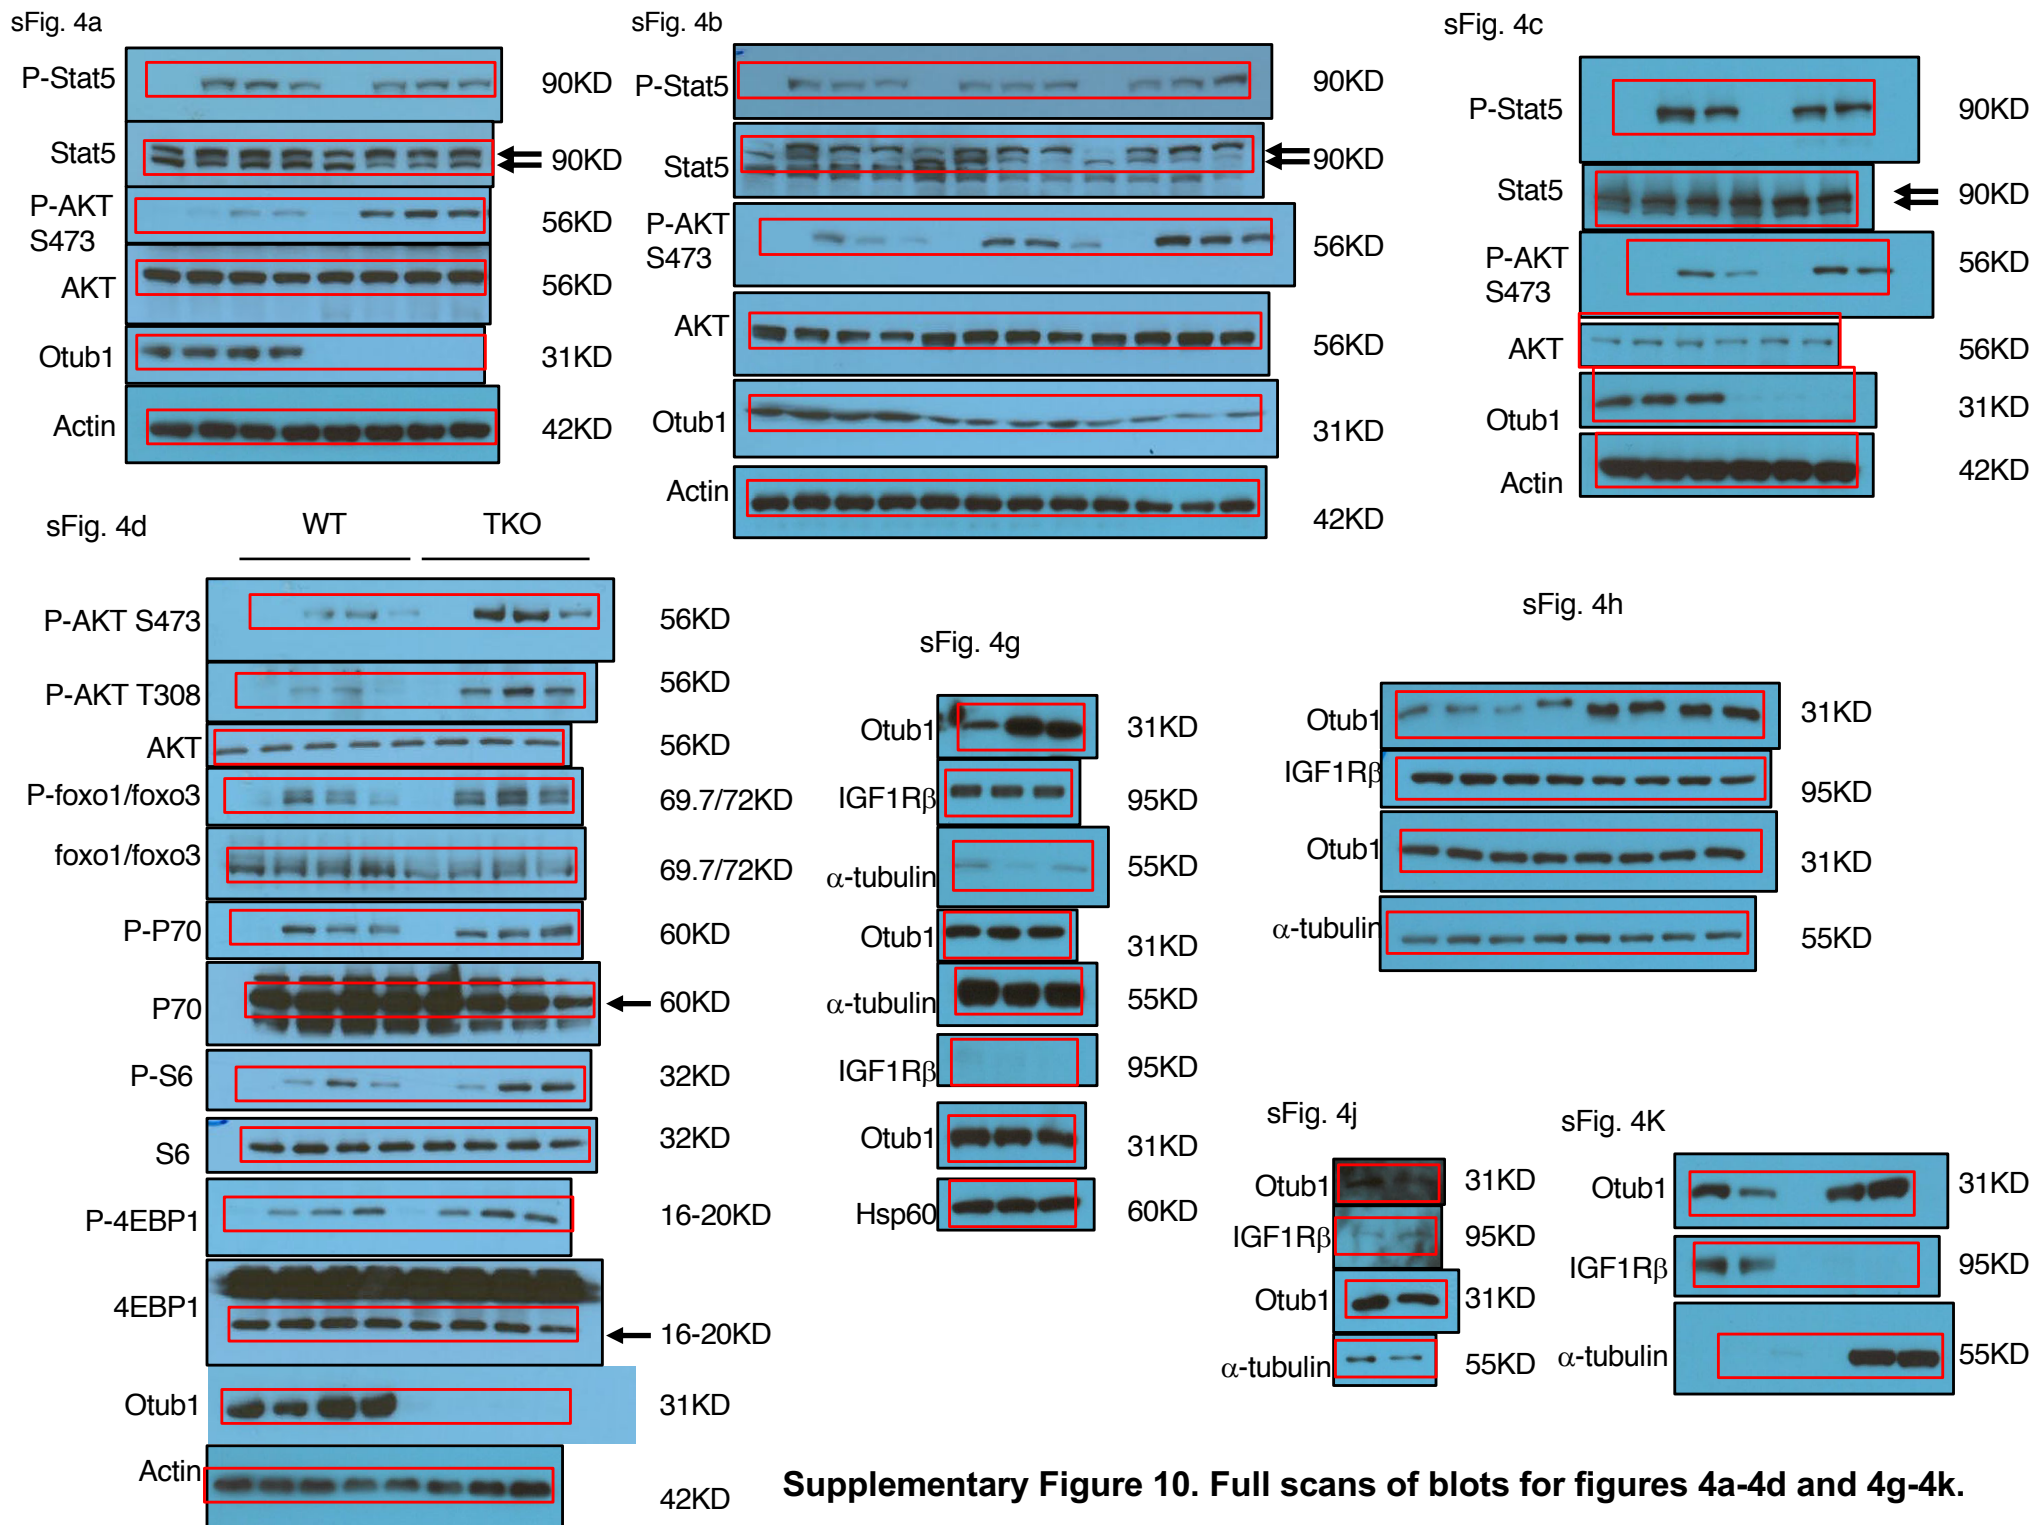

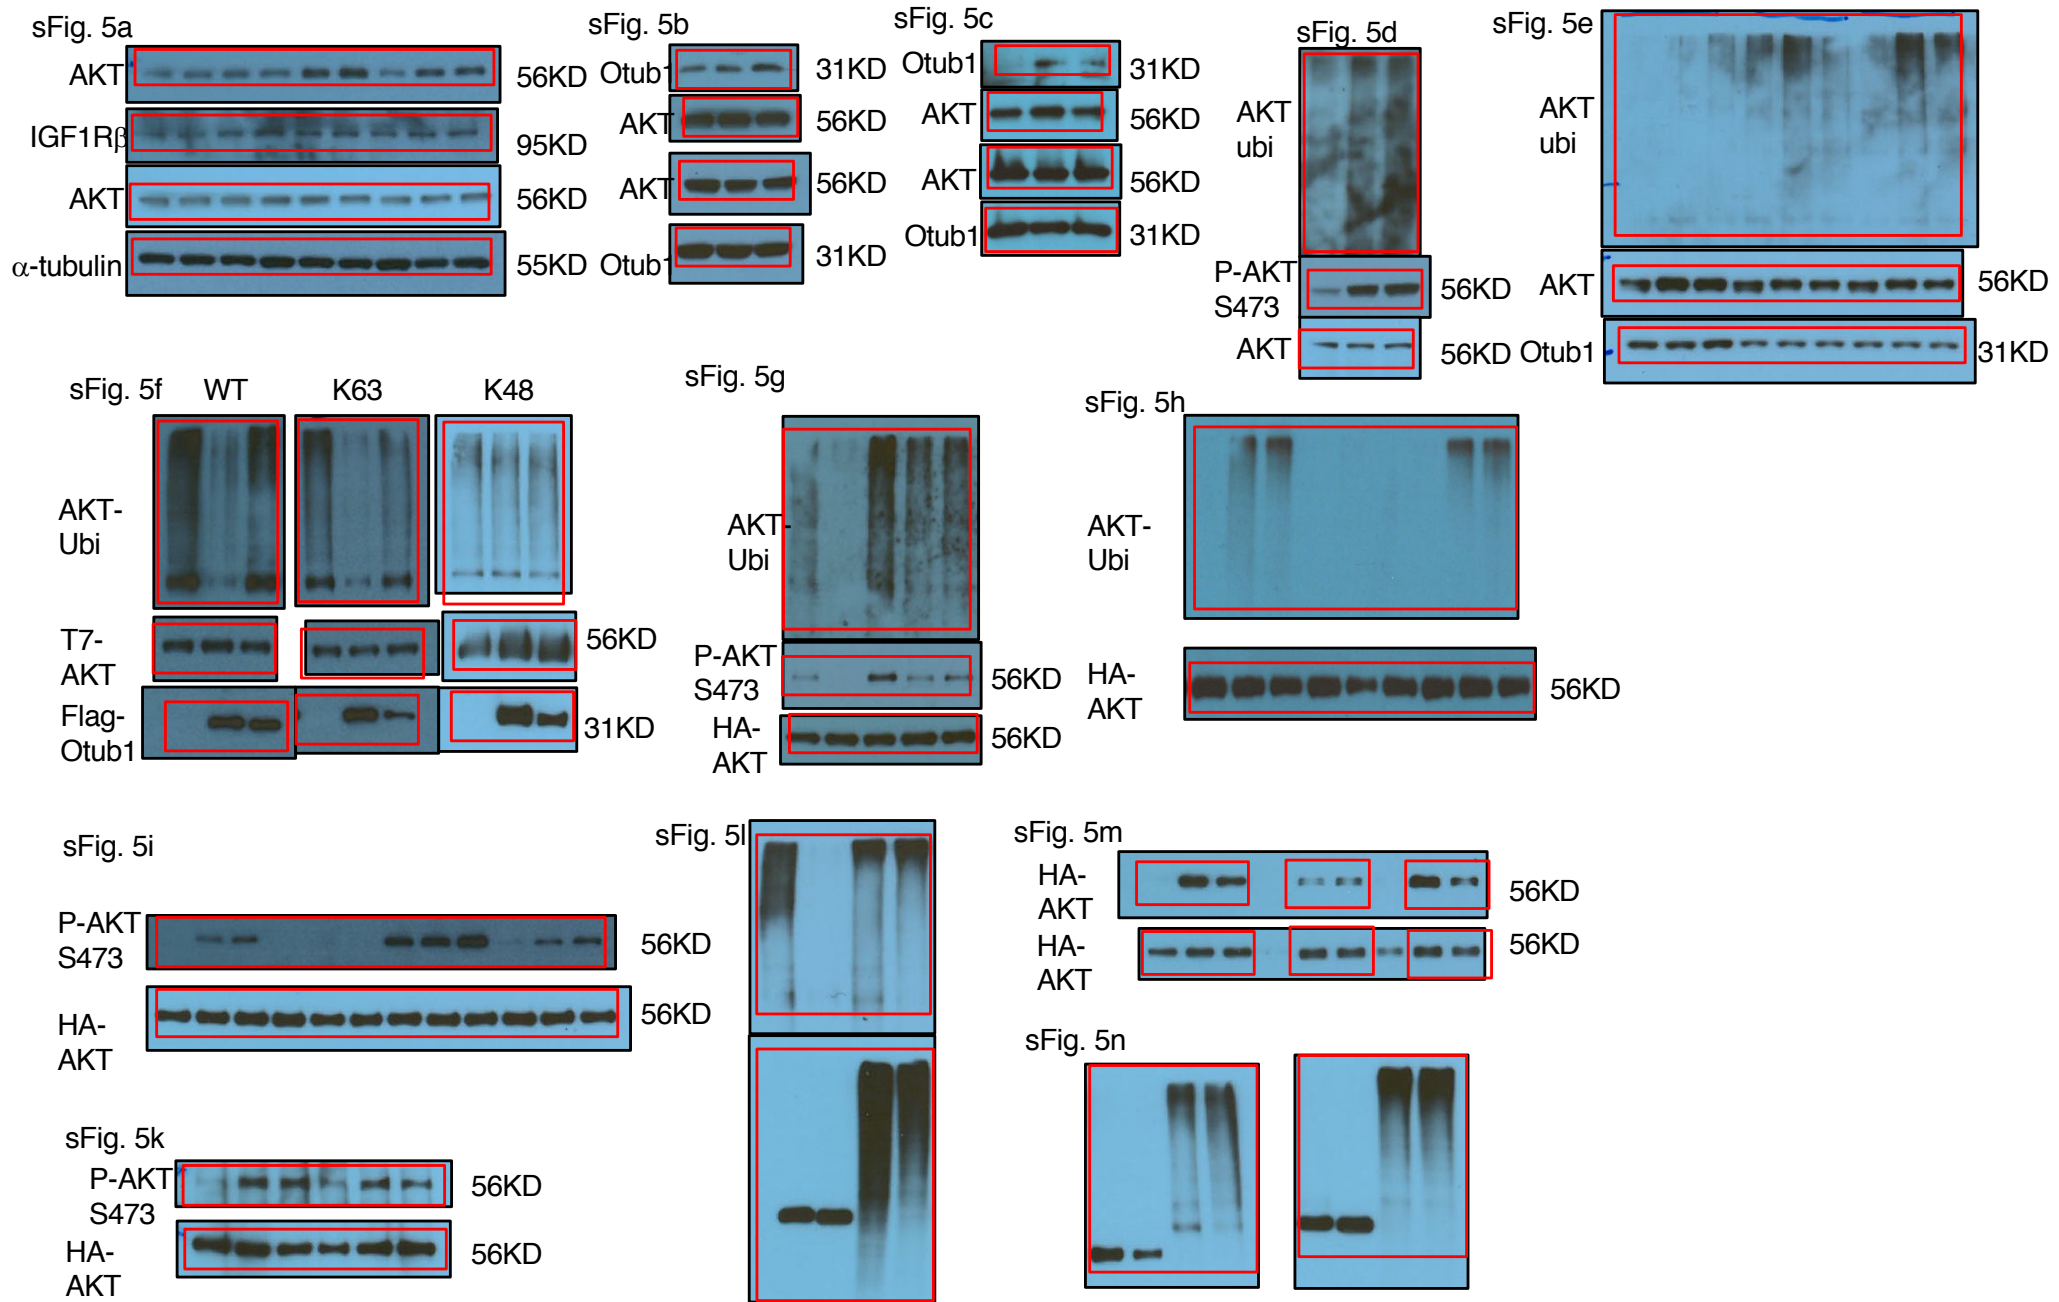

**Supplementary Figure 11. Full scans of blots for figures 5a-5i and 5k-5m.**

figure 6b

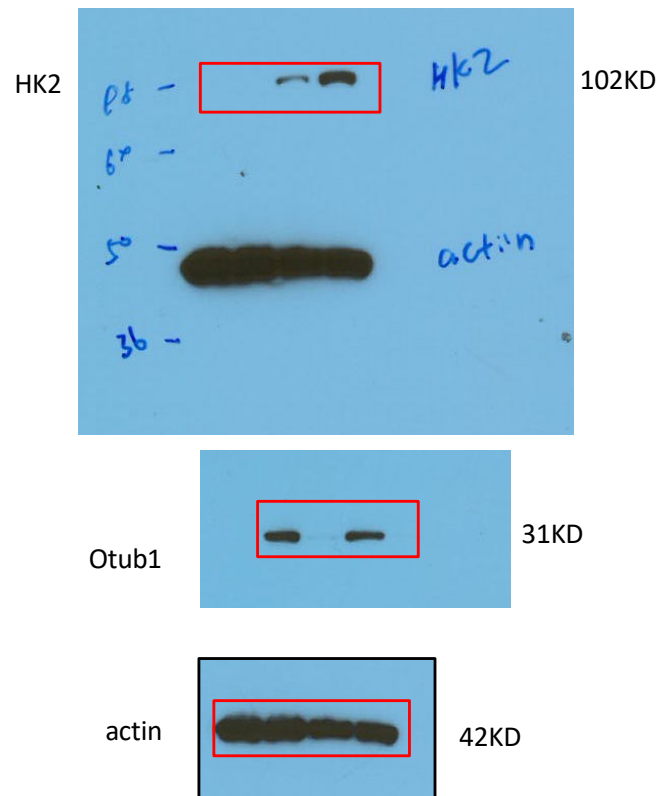

**Supplementary Figure 12. Full scans of blots for figures 6b.**
